# Supplementary material for: A behavioral signature for quantifying the social value of interpersonal relationships with specific others
Source: PubMed Central journal article supplement (PMC11379851; doi:10.1038/s44271-024-00132-2), 2024-09-06
Supplement: 44271_2024_132_MOESM2_ESM.pdf [file 44271_2024_132_MOESM2_ESM.pdf]

1 **A Behavioral Signature for Quantifying the Social Value of Interpersonal Relationships**  
2 **with Specific Others - Guassi Moreira & Parkinson**

3 **Supplement**

4 **Methods**

5 *Extended MaxDiff Rationale.* Intuitively, it might appear the most straightforward way to  
6 derive such a behavioral signature would simply be to collect Likert scale ratings on each of the  
7 activities. However, defining a behavioral signature according to our aims necessarily involves  
8 (i) deriving value weights for each activity by pitting the utility of activities against each other  
9 (thus incorporating opportunity cost) and (ii) estimating said weights such that they reflect the  
10 relative *scaling* between activities (i.e., the values of the weights describe the relative degree of  
11 preference between activity). These conditions implicitly rule out the use of Likert scale ratings  
12 because Likert scales are particularly susceptible to scale bias and are not easily able to  
13 accommodate trade-offs between activities that would be required to incorporate opportunity  
14 cost (34–36). Relatedly, asking participants to make forced choices between all possible activity  
15 pairings would be onerously time consuming and render the data susceptible to respondent  
16 fatigue.

17 For these reasons, we opted to use a MaxDiff design. Originally developed for use in  
18 marketing research, MaxDiff designs present respondents with a set of items and ask them to  
19 select the most appealing ('best') and least appealing ('worst') item based on a given feature of  
20 interest. This could involve a grocery chain polling potential customers about prospective  
21 seasonal snacks, or a polling company asking potential voters what issue they feel is most or  
22 least urgent for the current government to address. MaxDiff designs have enjoyed enormous  
23 popularity in marketing and applied economics (Sawtooth Software, 2020; Flynn, Terry, &  
24 Marley, 2012), and have also been creatively deployed in other disciplines (such as  
25 psychophysics, Maloney & Yang, 2003).

26 Critically, for our purposes, the competing nature of the MaxDiff design forces  
27 respondents to reveal trade-offs between items. Asking one to identify the 'best' and 'worst'  
28 items from a set theoretically requires individuals to evaluate every possible pair of items based  
29 on their subjective utilities and then select the most discrepant pairing. Combining this design  
30 with explicit instructions that emphasize scarcity should better align the ensuing activity weights  
31 with an economic concept of value (i.e., based on opportunity cost).

32 *Number of Sets Used in the MaxDiff Study.* As previously noted, we sourced two  
33 independent pools of activities from different populations to evaluate the robustness of our  
34 method. Following common guidelines (Sawtooth Software, 2020), the number of sets  
35 presented to participants was set to  $n * (K/k)$ , where  $n$  represents the number of times each  
36 activity is expected to appear across all sets,  $K$  represents the total number of items, and  $k$   
37 represents the number of activities presented in each set. In our study,  $n$  was always set to 3,  $k$   
38 was always set to 4, and  $K$  varied between the two different activity pools, 56 or 70, resulting in  
39 the presentation of 53 or 42 sets<sup>1</sup>.

40 *Extended Descriptions of Study Measures.*

---

<sup>1</sup> A few additional 'screeener' sets with attention checks were also presented to ensure participants were completing the experiment in a thoughtful manner.

41           *Relationship Quality.* The Inventory of Parent and Peer Attachment (IPPA; Armsden &  
42 Greenberg, 1987) was used to assess relationship quality in most of the exploratory data and all  
43 of the confirmatory data. We have extensively used the IPPA in prior similar studies to measure  
44 relationship quality (e.g., Guassi Moreira et al., 2018, 2021). Participants were instructed to use  
45 a 5-point Likert scale (1 = *almost never or never*, 5 = *almost always or always*) to answer 28  
46 items about their relationship with their parent and a second set of 25 items about their  
47 relationship with their friend and, separately, their acquaintance (sample parent item: “My parent  
48 respects my feelings”; sample friend/acquaintance item: “When we discuss things, my friend  
49 considers my point of view”). Thus, participants completed the parent version once, and the  
50 friend version twice (the term ‘friend’ was replaced with ‘acquaintance’ in the items when asking  
51 about the latter). Responses were reverse-scored where appropriate and averaged to create a  
52 single composite score for relationship quality with each social partner. Reliability was good to  
53 excellent in both the exploratory (parent  $\omega$ -total = 0.97, friend  $\omega$ -total = 0.96, acquaintance  $\omega$ -  
54 total = 0.82) and confirmatory (parent  $\omega$ -total = 0.98, friend  $\omega$ -total = 0.95, acquaintance  $\omega$ -total  
55 = 0.95) samples.

56           As an added robustness check, we collected two additional measures of relationship  
57 quality in a subset of the exploratory data (N = 75) to ensure the association between social  
58 value scores and relationship quality could generalize to other instruments. The first was the  
59 Unidimensional Relationship Closeness Scale (URCS; Dibble et al., 2011), an 11-item measure  
60 that requires participants to answer questions about a given other on a 7-point Likert scale (1 =  
61 *Strongly disagree*, 7 = *Strongly agree*; sample items: “My [other] and I have a strong  
62 connection”, “When we are apart, I miss my [other] a great deal”), and the second was the 7-  
63 item Relationship Assessment Scale (RAS; Hendrick, 1988) that involves a 5-point Likert scale  
64 (anchors vary; sample items: “How well does your [other] meet your needs?”, “How many  
65 problems are there in your relationship?”). Both measures displayed good reliability (RAS:  
66 parent  $\omega$ -total = 0.95, friend  $\omega$ -total = 0.92, acquaintance  $\omega$ -total = 0.94; URCS: parent  $\omega$ -total =  
67 0.98, friend  $\omega$ -total = 0.97, acquaintance  $\omega$ -total = 0.98). Items for both measures were reverse-  
68 scored where appropriate and averaged to yield relationship scores for each parent, friend, and  
69 acquaintance. Scores from both instruments correlated with social value scores in a similar  
70 manner as other relationship quality metrics, suggesting our procedure for quantifying social  
71 value yields scores that are generalizable with respect to various different instruments of  
72 relationship quality.

73           *Big Five Personality Traits.* We collected data on big five personality traits (Goldberg,  
74 1993) of the activity generation (AG) and MaxDiff (MD) samples to characterize our samples.  
75 Personality traits were assessed by asking participants to complete the 44-item version of the  
76 Big Five Inventory (BFI-44; John & Srivastava, 1999). Participants were asked to indicate how  
77 well a series of items described themselves (7-point Likert scale, 1 = *Strongly disagree*, 7 =  
78 *Strongly agree*). Each item tapped one of five personality trait continua (Extraversion: “Is  
79 outgoing, sociable”; Agreeableness: “Is helpful and unselfish with others”; Conscientiousness:  
80 “Makes plans and follows through with them”; Neuroticism: “Gets nervous easily”; Openness:  
81 “Likes to reflect, play with ideas”). Items for each trait were reversed scored and averaged  
82 together to produce five scores per subject. We observed excellent reliability with the measure  
83 in our samples (AG  $\omega$ -total = 0.95; MD  $\omega$ -total = 0.95).

84           *UCLA Loneliness Scale.* Like the BFI, data on self-reported loneliness were also  
85 collected in the MD sample to better characterize samples. Loneliness was assessed using

86 Version 3 of the UCLA Loneliness Scale (Russell, 1996). The measure is comprised of twenty  
87 questions designed to assess subjective levels of loneliness, such as ‘How often do you feel  
88 there is no one you can turn to?’ and ‘How often do you feel left out?’. Participants used a four-  
89 point Likert scale to endorse each item (1 = “Never”, 4 = “Always”). Reverse-worded items were  
90 recorded so that greater endorsement indicated greater loneliness. Scores were averaged after  
91 reverse coding to yield one value per participant. We observed excellent reliability with the  
92 measure in our sample (MD  $\omega$ -total = 0.96).

93 *One-Shot Dictator Game.* Participants completed three separate one-trial dictator games  
94 (Fehr & Camerer, 2007) involving all possible pairings of the three social partners assessed in  
95 this study. Dictator games have been used in behavioral economics and social psychology to  
96 study fairness, altruism, and social preferences. Here we used the task as a vehicle for  
97 understanding social decision preferences involving specific social partners. Participants were  
98 presented with the following prompt. “Suppose you had \$100 to split between the [PERSON 1]  
99 and the [PERSON 2] you nominated. Use the dropdown box below to indicate how you would  
100 allocate the money”. “PERSON 1” and “PERSON 2” were replaced with (parent, friend), (parent,  
101 acquaintance), and (friend, acquaintance) on their respective trials. Allocations ranged from  
102 (\$100 PERSON 1, \$0 PERSON 2) to (\$0 PERSON 1, \$100 PERSON 2) in \$5 increments for a  
103 total of 21 choice options. Participants used a drop-down menu to select their preferred  
104 allocation. To aid interpretability during analysis, responses were recoded as the percentage of  
105 money allocated to PERSON 1 for a given trial (PERSON 1 = parent in [parent, friend] pair;  
106 PERSON 1 = parent in [parent, acquaintance] pair; PERSON 1 = friend in [friend, acquaintance]  
107 pair).

108 *Forced Choice Question About Spending Time.* Participants completed three separate  
109 forced choice questions about spending time with pairs of social partners. Participants were  
110 presented with the following prompt. “Suppose you had a free afternoon with no obligations or  
111 commitments. Assuming you could only spend it with one person, would you rather spend it with  
112 [PERSON 1] you nominated or [PERSON 2] you nominated?”. “PERSON 1” and “PERSON 2”  
113 were replaced with (parent, friend), (parent, acquaintance), and (friend, acquaintance) on their  
114 respective questions. The goal of this measure was to examine social decision-making  
115 preferences among these social partners when social outcomes (e.g., time spent with someone)  
116 were at stake (as opposed to monetary outcomes). Responses were binary coded among the  
117 pairs such that (1 = parent, 0 = 1 friend; 1 = parent, 0 = acquaintance; 1 = friend, 0 =  
118 acquaintance).

119 *Social Loss Aversion.* Participants completed a novel measure of what we termed ‘social  
120 loss aversion’. Participants used a slider ranging to 0 (not at all) to 100 (extremely) to indicate  
121 how upset they would be if they could no longer spend time with a given social partner. The  
122 question was presented to participants 3 times, once involving each social partner.

123 *Ideal and Actual Time Spent.* Participants were asked both (i) how often they saw and  
124 (ii) how often they wished to see each of the social partners on an average month. Participants  
125 used a dropdown menu to select the number of days, ranging from 0 to 30+ in increments of 1  
126 day. The question was presented to participants 3 times, once involving each social partner.

127 *Multi-Trial Social Decision Behavior.* We used a pair of computerized delay discounting  
128 tasks to assess social decision preferences among the targets studied here. Our rationale for  
129 doing so is threefold. First, discounting decisions are both pervasive in everyday life and are

130 thought to be important for shaping life adjustment outcomes (Ludwig et al., 2019). Second,  
131 computerized discounting tasks deployed in research settings are flexible in their configuration,  
132 allowing researchers to study social decision behavior with respect to diverse reward outcomes  
133 (Seaman et al., 2016). Last, we previously used discounting tasks to reliably tap social decision  
134 preferences involving specific social partners (Guassi Moreira et al., 2021), thereby providing  
135 the current study with a baseline with which to provide a point of comparison.

136 Participants were asked to make decisions across two separate runs of a delay  
137 discounting task. On each trial, participants were presented with two hypothetical scenarios that  
138 pitted outcomes for two targets against each other. One scenario involved a relatively  
139 immediate, smaller reward and the other involved a relatively delayed, larger reward. The  
140 delays could take the value of zero ('Today'), 2 weeks, 4 weeks, and 6 weeks. Values of zero  
141 and 6 weeks were never presented in the delayed or immediate scenarios, respectively. Both  
142 runs involved trials that pitted outcomes associated with each target against the other (parent vs  
143 friend outcomes; parent vs acquaintance outcomes; friend vs acquaintance outcomes).  
144 Because a given target could be associated with the immediate or delayed reward, this resulted  
145 in six unique conditions for the task (parent ~ immediate vs friend ~ delayed, friend ~ immediate  
146 vs parent delayed, etc.).

147 The two runs differed in the type of rewards offered to participants. One of the runs  
148 offered participants hypothetical monetary rewards (in USD) to be earned on behalf of either  
149 target (e.g., \$16 for a given target); the other run was comprised of social rewards, offering  
150 participants hypothetical time spent with either target (e.g., 16 minutes of time spent with a  
151 given target). Values for each type of reward ranged from 2 – 30. There were 49 unique  
152 combinations of reward and time pairings (e.g., \$2 now versus \$18 two weeks from now) for  
153 each condition, resulting in 294 unique possible trial types (consistent with our prior work;  
154 Guassi Moreira et al., 2021). In the interest of reducing task demands for participants, each run  
155 was comprised of 60 trial types randomly selected from the master list of 294. Participants made  
156 their selection via button press on a keyboard and were granted as much time as needed to do  
157 so.

158 Both runs were programmed in PsychoPy3 (Peirce, 2007) and hosted on the online data  
159 collection platform Pavlovia.org. The visual characteristics of the task were programmed to be  
160 consistent with a prior study (Seaman et al., 2016). Participants accessed each run of the task  
161 through a link embedded in the Qualtrics survey. Importantly, participants received extensive  
162 instructions on how to complete the task and could not access the task link until confirming they  
163 understood the task. It was heavily stressed that participants were to complete the task as if all  
164 rewards were real, even though they were in fact hypothetical.

165 *Modeling of Multi-Trial Social Decision Behavior.* We used a hierarchical Bayesian  
166 model to analyze data from the multi-trial social decision tasks. Decisions on the  $i$ -th trial from  
167 the  $j$ -th participant on the discounting tasks were modeled as being distributed Bernoulli.

168 
$$\text{Decision}_{ij} \sim \text{Ber}(p_{ij})$$

169 The distribution takes a single parameter ( $p$ ) that describes the probability of 'success'.  
170 Here,  $p_{ij}$  represents the probability of the  $j$ -th participant making a discounting decision (i.e.,  
171 choosing the more immediate reward) on the  $i$ -th trial. The log odds of these probabilities were  
172 further modeled as a linear combination of trial-level variables.

173  $\ln(p_{ij} / (1 - p_{ij})) = b_{1j} * PF_{ij} + b_{2j} * FP_{ij} + b_{3j} * PA_{ij} + b_{4j} * AP_{ij} + b_{5j} * FA_{ij} + b_{6j} * AF_{ij} + b_{7j} * RewardRatio_{ij}$

174 In this parameterization,  $b_{1j}$ –  $b_{6j}$  represent participant-specific decision preferences for  
 175 choosing to, or to not, discount for a given condition on the task. Their corresponding variables  
 176 are a set of overparameterized dummy codes that signify which condition corresponded to the  $i$ -  
 177 th trial for the  $j$ -th participant. The first letter in each code designates which target was affected  
 178 by the discounting decision (i.e., associated with the relatively immediate reward) and the  
 179 second letter indicates the target affected by the non-discounting choice (associated with the  
 180 relatively delayed reward). Thus, the  $PF_{ij}$  variable is a vector of 1s and 0s, with the former  
 181 corresponding to the trials where the participant had to choose between a relatively immediate  
 182 reward for a parent or a relatively delayed reward for a friend, and the latter corresponding to  
 183 trials where this was not the case. The final coefficient,  $b_{7j}$ , corresponded to the effect of a ratio  
 184 between the delayed reward over the immediate reward, and served as a control variable. Note  
 185 that the lack of an intercept in this model is intentional, as it allows for estimation of adjusted  
 186 means for each condition which denote the log odds of choosing to discount under each  
 187 condition.

188 We entered our social value scores as moderators at the between-participant level such  
 189 that scores for a given target moderated any trial-level effect involving that target:

190  $b_{1j} = \gamma_{10} + \gamma_{11} * SocValPar_j + \gamma_{12} * SocValFri_j + u_{1j}$

191  $b_{2j} = \gamma_{20} + \gamma_{21} * SocValPar_j + \gamma_{22} * SocValFri_j + u_{2j}$

192  $b_{3j} = \gamma_{30} + \gamma_{31} * SocValPar_j + \gamma_{32} * SocValAcq_j + u_{3j}$

193  $b_{4j} = \gamma_{40} + \gamma_{41} * SocValPar_j + \gamma_{42} * SocValAcq_j + u_{4j}$

194  $b_{5j} = \gamma_{50} + \gamma_{51} * SocValFri_j + \gamma_{52} * SocValAcq_j + u_{5j}$

195  $b_{6j} = \gamma_{60} + \gamma_{61} * SocValFri_j + \gamma_{62} * SocValAcq_j + u_{6j}$

196 Where ‘SocVal’ refers to a grand-mean centered social value score and ‘Par’ refers to parent,  
 197 ‘Fri’ refers to friend, and ‘Acq’ refers to acquaintance. These terms were also entered into the  
 198 model as lower-level predictors to ensure the validity of the higher order interaction term. The  
 199 final trial-level coefficient ( $b_{7j}$ ) was not associated with any moderating variables and thus would  
 200 only be expressed as  $b_{7j} = \gamma_{70} + u_{7j}$ . Coefficients  $b_{1j} - b_{6j}$  represent the log odds of choosing to  
 201 discount or not for a particular condition (e.g., when parent is affected by the discounting choice  
 202 and friend is affected by the delayed choice) and thus coefficients for the cross-level interactions  
 203 reflected changes in the log odds of choosing to discount or not in a particular condition. Each  
 204 coefficient on its own cannot speak to the relationship between social value and a preference for  
 205 a specific relationship partner across both conditions involving said partner. In order to fully  
 206 understand the relationship between social decision preferences and social value we therefore  
 207 needed to difference the posterior samples for coefficient pairs  $(\gamma_{11}, \gamma_{21})$ ,  $(\gamma_{12}, \gamma_{22})$ ,  $(\gamma_{31}, \gamma_{41})$ ,  $(\gamma_{32},$   
 208  $\gamma_{42})$ ,  $(\gamma_{51}, \gamma_{61})$ , and  $(\gamma_{52}, \gamma_{62})$ . The posterior means and credible intervals for these differences  
 209 were used to understand the relationship between social value and social decision preferences.  
 210 An additional version of the model without any between-participant predictors was run to  
 211 replicate and extend prior work observed in Guassi Moreira et al., 2021 (results replicate prior  
 212 work, not reported for sake of brevity). All hierarchical models were fit using the *brms* package  
 213 in R (Bürkner, 2017) with a target average acceptance proposal probability of .95, a step-size of

214 .05, max tree depth of 15, 8 chains, 1000 iterations per chain with 500 warm-up samples and no  
215 thinning.

216 *Affiliative Social Behavior Items.* Participants were presented with additional forced  
217 choice items about affiliative social behavior in the confirmatory phase of the study. These items  
218 were included with the aim of enriching our understanding the association between social value  
219 scores and self-reported social behavior. The following items were presented to participants:  
220 'Who are you more likely to turn to if you're seeking advice or support on an issue?', 'Who would  
221 you be more likely to celebrate something with?', 'Who is more likely to be the *first* person you  
222 would share positive personal news with?', 'Who is more likely to be the *first* person you would  
223 share negative personal news with?', 'Assuming both others needed to borrow money, but you  
224 could only lend to one person, who would you choose to lend money to?', 'Who would you  
225 rather go out to dinner with?'. Participants answered each question three times, covering all  
226 possible pairings of the social agents assessed in this study.

227 *Pre-Registration Deviations.* We initially pre-registered that we would control for  
228 relationship quality in all analyses. As the study progressed, following discussions with  
229 colleagues, we came to believe that this choice was misguided for a few reasons. First, it  
230 inadvertently implies a competition between relationship and quality and social value that we  
231 feel is inappropriate. How social value relates to the current study's outcome variables remains  
232 an open question, and whether or not relationship quality is a *better* predictor of these variables  
233 is not relevant to our purposes. Second, relationship quality is not privileged over other  
234 correlates of social value, and controlling for relationship quality would imply that we would need  
235 to control for all other correlates of social value when modeling the association between social  
236 value and social behavior, which is outside the scope of this manuscript, would inflate the  
237 manuscript's analytic flexibility, and might hamper the interpretability of our findings.

238 At the advice of peer reviewers, however, we ended up running *post hoc* analyses that  
239 included social values scores, relationship quality, and social loss aversion in the same model.  
240 The decision to do this was made after the initial deviation from the pre-registration to not  
241 control for relationship quality. All results from the *post hoc* analyses section were motivated by  
242 reviewer comments and were thus not part of our initial pre-registration. A final deviation was  
243 already noted in the manuscript regarding us beginning our confirmatory data collection but then  
244 switching from MTurk to Prolific due to a high incidence of fraudulent responding on MTurk. We  
245 analyzed and reported the usable MTurk data as tests of generalizability between online  
246 populations and replicability, more generally (and because it also seemed like good scientific  
247 practice to analyze usable data where available).

## 248 **Results**

### 249 *Exploratory Phase*

250 *Paired Difference Analyses.* Paired differences were estimated in the Cohen's *d* effect  
251 size metric and received a weakly informative prior (see code; [osf.io/4qe7t](https://osf.io/4qe7t)). Overall, across the  
252 five exploratory subsamples, social value scores tended to be greater for friends relative to  
253 parents (Cohen's  $d_{\text{Parent} - \text{Friend}}$ : -0.13, moderate to robust evidence observed in 3/5 subsamples),  
254 parents relative to acquaintances (Cohen's  $d_{\text{Parent} - \text{Acquaintance}}$ : 0.54, robust evidence observed in  
255 5/5 subsamples) and friends relative to acquaintances (Cohen's  $d_{\text{Parent} - \text{Friend}}$ : 0.64, robust  
256 evidence observed in 5/5 subsamples).

257 As a comparison, we also computed paired differences between relationship quality  
258 scores involving the three social partners. The rationale for this was to determine how the  
259 pattern of results with our metric of social value compares to another related yet distinct  
260 construct. Across the five exploratory subsamples, relationship quality was greater for friends  
261 relative to parents (Cohen's  $d_{\text{Parent} - \text{Friend}}$ : -0.62, robust evidence observed in 5/5 subsamples),  
262 parents relative to acquaintances (mean Cohen's  $d_{\text{Parent} - \text{Acquaintance}}$ : 0.36, moderate to robust  
263 evidence observed in 4/5 subsamples) and friends relative to acquaintances (mean Cohen's  $d$   
264  $d_{\text{Parent} - \text{Friend}}$ : 1.17, robust evidence observed in 5/5 subsamples). See Supplementary Table 7 for  
265 sample-specific results. An example of these general trends, using data from the confirmatory  
266 sample, is depicted in Supplementary Figure 2.

267 That the pattern of results involving social value scores resembled, but did not  
268 completely mimic, results with relationship quality suggests social value scores differentiate  
269 between social partners but may also provide unique information.

### 270 *Confirmatory Phase*

271 *Paired Difference Analyses.* As in the exploratory sample, social value scores tended to  
272 be greater for parents relative to acquaintances (mean Cohen's  $d$ : 0.51, robust evidence  
273 observed in 4/4 subsamples), and greater for friends relative to acquaintances (mean Cohen's  
274  $d$ : 0.6, robust evidence observed in 4/4 subsamples). The evidence involving paired differences  
275 in social value scores for parents and friends was more mixed, with two subsamples robustly  
276 replicating the previously observed trend of friend > parent (mean Cohen's  $d$ : -0.31), and the  
277 other two subsamples suggesting the opposite effect (mean Cohen's  $d$ : 0.12), albeit with more  
278 modest evidence (smaller effect size, one confidence interval crosses zero).

279 Some relationship quality results here replicated findings from the exploratory phase. We  
280 again found that relationship quality was greater for friends relative to parents (mean Cohen's  $d$ :  
281 -0.76, robust evidence in 4/4 subsamples) and greater for friends relative to acquaintances  
282 (mean Cohen's  $d$ : 1.02, robust evidence in 4/4 subsamples). However, relationship quality was  
283 relatively more equivocal between parents and acquaintances, with a weaker preference  
284 observed for parents over acquaintances this time (mean Cohen's  $d$ : 0.07, moderate to robust  
285 evidence in 3/4 subsamples).

286

287

288

289

290

291

292

293

294

295

296

297

298 *Supplementary Table 1. SONA-Generated Activities and SONA-Rated Weights*

| Activity                                                              | Raw Weight | Activity Variance | Scaled Weight |
|-----------------------------------------------------------------------|------------|-------------------|---------------|
| Self-applying a cosmetic treatment (ex: painting nails, styling hair) | -0.08      | 1.28              | -0.06         |
| Receiving a cosmetic treatment (ex: hair styling) from a professional | -0.29      | 1.31              | -0.22         |
| Attend to your personal finances (ex: budgeting, investment planning) | -0.48      | 0.32              | -1.50         |
| Attending a musical event                                             | -0.05      | 0.44              | -0.11         |
| Attending a sporting event                                            | -0.76      | 0.95              | -0.80         |
| Attending a performance (ex: theater)                                 | -0.17      | 0.58              | -0.29         |
| Attending an academic event (ex: a public lecture)                    | -0.38      | 0.85              | -0.45         |
| Attending a social gathering                                          | 0.67       | 0.94              | 0.71          |
| Attending a school or work-related activity                           | 0.22       | 1.05              | 0.21          |
| Completing personal chores/tasks                                      | 0.93       | 1.78              | 0.52          |
| Discussing personal matters                                           | -0.09      | 0.58              | -0.16         |
| Exploring city spaces                                                 | 0.38       | 0.49              | 0.78          |
| Getting ahead on work                                                 | 0.52       | 0.9               | 0.58          |
| Getting your car serviced (ex: oil change, tire change)               | -0.85      | 1.22              | -0.70         |
| Giving someone a ride                                                 | -0.4       | 0.91              | -0.44         |
| Going for a walk                                                      | 0.44       | 0.37              | 1.19          |
| Going out for a drink                                                 | -0.49      | 1.08              | -0.45         |
| Going out to eat                                                      | 0.74       | 0.6               | 1.23          |
| Going to a cafe                                                       | 0.35       | 0.73              | 0.48          |
| Grocery shopping                                                      | 0.26       | 0.39              | 0.67          |
| Hosting a social gathering                                            | -0.11      | 0.57              | -0.19         |
| Listening to music                                                    | 0.75       | 0.94              | 0.80          |



|                                                                                             |       |      |       |
|---------------------------------------------------------------------------------------------|-------|------|-------|
| Looking for new housing (ex: searching rentals or properties on zillow, touring a property) | -0.72 | 1.03 | -0.70 |
| Looking up directions to a place you may need to get to                                     | 0.1   | 0.75 | 0.13  |
| Ordering take-out                                                                           | 0.08  | 0.92 | 0.09  |
| Participating in online games/activities                                                    | 0.57  | 1.47 | 0.39  |
| Participating in recreational games (ex: bowling, chess, D&D, Risk)                         | 0.24  | 1.08 | 0.22  |
| Participating in a religious activity                                                       | -1.02 | 3.2  | -0.32 |
| Taking photographs as part of a hobby                                                       | -0.33 | 0.37 | -0.89 |
| Planning a gathering for work (ex: conference, job panel)                                   | -0.72 | 0.25 | -2.88 |
| Planning a social gathering                                                                 | -0.14 | 0.47 | -0.30 |
| Planning a vacation                                                                         | -0.3  | 0.77 | -0.39 |
| Playing a musical instrument                                                                | -0.15 | 1.22 | -0.12 |
| Playing a sport                                                                             | 0.2   | 1.47 | 0.14  |
| Playing a video game                                                                        | 0     | 2.06 | 0.00  |
| Practicing a new skill (ex: musical instrument, writing compute code)                       | 0.1   | 0.82 | 0.12  |
| Preparing food (ex: cooking, baking)                                                        | 0.41  | 0.58 | 0.71  |
| Getting ready for a social gathering                                                        | 0.13  | 1.26 | 0.10  |
| Processing an emotional event                                                               | -0.16 | 0.65 | -0.25 |
| Reading                                                                                     | 0.33  | 0.85 | 0.39  |
| Sleeping/taking a nap                                                                       | 0.79  | 0.97 | 0.81  |
| Researching a new product before purchasing it                                              | 0.21  | 0.54 | 0.39  |
| Resting or relaxing                                                                         | 1.14  | 1.24 | 0.92  |
| Seeking out advice                                                                          | 0.02  | 0.53 | 0.04  |

|                                                                                                  |       |      |       |
|--------------------------------------------------------------------------------------------------|-------|------|-------|
| Seeking out something that makes you laugh                                                       | 0.83  | 0.7  | 1.19  |
| Sharing or creating online content (ex: Blogging, TikTok videos)                                 | -0.34 | 1.25 | -0.27 |
| Shopping                                                                                         | 0.46  | 0.34 | 1.35  |
| Spending time at a mall                                                                          | 0.2   | 0.82 | 0.24  |
| Spending time at a park                                                                          | 0.28  | 0.32 | 0.88  |
| Spending time at a pool                                                                          | -0.05 | 1.15 | -0.04 |
| Spending time at an amusement park                                                               | -0.32 | 1    | -0.32 |
| Spending time on activities related to a club                                                    | 0.28  | 1.02 | 0.27  |
| Spending time at amusement parks                                                                 | -0.3  | 1.13 | -0.27 |
| Spending time on artistic activities                                                             | 0.09  | 1.15 | 0.08  |
| Spending time on social media (ex: TikTok, Twitter, Instagram, Facebook)                         | 1.12  | 1.03 | 1.09  |
| Playing with a pet(s)                                                                            | 0.06  | 1.38 | 0.04  |
| Learning something new                                                                           | 0.22  | 0.4  | 0.55  |
| Visiting a funeral home                                                                          | -1.81 | 0.61 | -2.97 |
| Visiting a gun range for recreational shooting                                                   | -1.18 | 2.79 | -0.42 |
| Visiting a museum                                                                                | -0.4  | 0.86 | -0.47 |
| Visiting the local library                                                                       | -0.97 | 0.47 | -2.06 |
| Volunteering                                                                                     | -0.05 | 1.04 | -0.05 |
| Waiting in line for something anticipated (ex: concert tickets, merchandise, national park pass) | -0.69 | 0.97 | -0.71 |
| Watching a movie in a theater                                                                    | -0.04 | 0.38 | -0.11 |
| Watching something on a streaming service                                                        | 0.87  | 1.42 | 0.61  |
| Watching something online (ex: YouTube)                                                          | 1.24  | 1.09 | 1.14  |

|                     |       |      |       |
|---------------------|-------|------|-------|
| Watching sports     | -0.67 | 1.17 | -0.57 |
| Watching television | 0.12  | 0.6  | 0.20  |
| Going for a run     | -0.34 | 1.43 | -0.24 |
| Lifting weights     | -0.44 | 2.31 | -0.19 |

---

299 *Note.* SONA refers to the UCLA undergraduate psychology subject pool. SONA participants  
300 generated activities, which experimenters pared down into slightly more abstract descriptions,  
301 as described in the main text, to facilitate consolidation of activities across respondents. A  
302 separate sample of SONA participants rated the activities in a MaxDiff design to yield the data  
303 that were used to calculate the weights that were used to compute social value scores.

304  
305  
306  
307  
308  
309  
310  
311  
312  
313  
314  
315  
316  
317  
318  
319  
320  
321  
322  
323  
324  
325  
326  
327

328  
 329  
 330  
 331  
 332  
 333  
 334  
 335  
 336  
 337  
 338  
 339  
 340  
 341  
 342  
 343  
 344  
 345

*Supplementary Table 2. Illustrative example of a MaxDiff design matrix*

| Choice | Set | <i>Overparameterized Indicator Variables</i> |           |           |           |           |           |
|--------|-----|----------------------------------------------|-----------|-----------|-----------|-----------|-----------|
|        |     | <i>A1</i>                                    | <i>A2</i> | <i>A3</i> | <i>A4</i> | <i>A5</i> | <i>A6</i> |
| 1      | 1   | 1                                            | 0         | 0         | 0         | 0         | 0         |
| 0      | 1   | 0                                            | 0         | 1         | 0         | 0         | 0         |
| 0      | 1   | 0                                            | 0         | 0         | 1         | 0         | 0         |
| 1      | 1   | -1                                           | 0         | 0         | 0         | 0         | 0         |
| 0      | 1   | 0                                            | 0         | -1        | 0         | 0         | 0         |
| 0      | 1   | 0                                            | 0         | 0         | -1        | 0         | 0         |
| 0      | 2   | 0                                            | 0         | 0         | 1         | 0         | 0         |
| 1      | 2   | 0                                            | 0         | 0         | 0         | 1         | 0         |
| 0      | 2   | 0                                            | 0         | 0         | 0         | 0         | 1         |
| 0      | 2   | 0                                            | 0         | 0         | -1        | 0         | 0         |
| 0      | 2   | 0                                            | 0         | 0         | 0         | -1        | 0         |
| 1      | 2   | 0                                            | 0         | 0         | 0         | 0         | -1        |

*Note.* 'Choice' refers to whether the hypothetical activity was selected in either the 'best' or 'worst' column. A1 – A6 represent overparameterized codes indicating whether the activity was presented in the 'best' (1) or 'worst' column (-1), or neither (0). 'Set' refers to the random grouping of activities included on a given page of the survey.

346  
 347  
 348  
 349  
 350  
 351  
 352  
 353  
 354

355 *Supplementary Table 3. Association between social value scores and social decision*  
 356 *preferences on one-shot tasks (exploratory sample).*

| Task                        | Social Partner Pairs         | Person 1             | Person 2              |
|-----------------------------|------------------------------|----------------------|-----------------------|
| Dictator Game (Sona-1)      | Parent (1), Friend (2)       | -0.059 [-0.37, 0.24] | -0.092 [-0.42, 0.23]  |
| Dictator Game (Sona-1)      | Parent (1), Acquaintance (2) | 0.015 [-0.30, 0.32]  | 0.034 [-0.27, 0.37]   |
| Dictator Game (Sona-1)      | Friend (1), Acquaintance (2) | 0.079 [-0.23, 0.40]  | -0.029 [-0.36, 0.28]  |
| Dictator Game (Sona-2)      | Parent (1), Friend (2)       | 0.084 [-0.39, 0.53]  | -0.400 [-0.88, 0.05]  |
| Dictator Game (Sona-2)      | Parent (1), Acquaintance (2) | -0.183 [-0.62, 0.24] | -0.004 [-0.41, 0.43]  |
| Dictator Game (Sona-2)      | Friend (1), Acquaintance (2) | 0.072 [-0.33, 0.50]  | -0.184 [-0.59, 0.23]  |
| Dictator Game (Sona-3)      | Parent (1), Friend (2)       | 0.110 [-0.11, 0.35]  | -0.156 [-0.38, 0.09]  |
| Dictator Game (Sona-3)      | Parent (1), Acquaintance (2) | 0.021 [-0.17, 0.21]  | -0.302 [-0.49, -0.11] |
| Dictator Game (Sona-3)      | Friend (1), Acquaintance (2) | -0.029 [-0.23, 0.18] | -0.258 [-0.46, -0.06] |
| Dictator Game (MTurk-1)     | Parent (1), Friend (2)       | 0.139 [-0.07, 0.34]  | -0.492 [-0.70, -0.30] |
| Dictator Game (MTurk-1)     | Parent (1), Acquaintance (2) | 0.167 [-0.04, 0.36]  | -0.297 [-0.48, -0.10] |
| Dictator Game (MTurk-1)     | Friend (1), Acquaintance (2) | -0.194 [-0.42, 0.02] | -0.022 [-0.24, 0.20]  |
| Forced Choice Time (Sona-1) | Parent (1), Friend (2)       | -0.057 [-0.58, 0.59] | -0.139 [-0.74, 0.44]  |
| Forced Choice Time (Sona-1) | Parent (1), Acquaintance (2) | -0.223 [-1.15, 0.77] | -0.288 [-1.22, 0.66]  |
| Forced Choice Time (Sona-1) | Friend (1), Acquaintance (2) | 0.007 [-1.24, 1.28]  | -0.017 [-1.24, 1.17]  |
| Forced Choice Time (Sona-2) | Parent (1), Friend (2)       | -0.239 [-1.11, 0.59] | -0.330 [-1.20, 0.54]  |
| Forced Choice Time (Sona-2) | Parent (1), Acquaintance (2) | 0.331 [-0.69, 1.22]  | 0.331 [-0.54, 1.35]   |
| Forced Choice Time (Sona-2) | Friend (1), Acquaintance (2) | 0.748 [-0.42, 1.97]  | 0.126 [-1.05, 1.32]   |

|                              |                              |                      |                       |
|------------------------------|------------------------------|----------------------|-----------------------|
| Forced Choice Time (Sona-3)  | Parent (1), Friend (2)       | -0.009 [-0.50, 0.46] | -0.671 [-1.19, -0.17] |
| Forced Choice Time (Sona-3)  | Parent (1), Acquaintance (2) | -0.188 [-1.12, 0.72] | 0.162 [-0.74, 1.08]   |
| Forced Choice Time (Sona-3)  | Friend (1), Acquaintance (2) | -0.016 [-1.26, 1.16] | 0.012 [-1.28, 1.16]   |
| Forced Choice Time (MTurk-1) | Parent (1), Friend (2)       | 0.131 [-0.31, 0.59]  | -0.629 [-1.12, -0.15] |
| Forced Choice Time (MTurk-1) | Parent (1), Acquaintance (2) | 0.224 [-0.28, 0.74]  | -0.180 [-0.69, 0.32]  |
| Forced Choice Time (MTurk-1) | Friend (1), Acquaintance (2) | -0.010 [-0.76, 0.73] | 0.217 [-0.54, 0.95]   |

357 *Note.* Each row in the table represents a model wherein social value scores from two social  
358 partners were entered to predict a social decision preference on either dictator game or forced  
359 choice time spent items. ‘Task’ refers to paradigm used to capture social decision preferences.  
360 ‘Social Partner Pairs’ refers to which social partners’ social value scores were included as  
361 predictors in the analysis. Outcomes were coded such that a positive slope for Person 1 means  
362 increases in Person 1’s social value score were related to a preference for Person 1 over  
363 Person 2 for the given task; a negative slope for Person 2 means increases in Person 2’s social  
364 value score were related to a preference for Person 2 over Person 1. Unbracketed numbers in  
365 the ‘Person [1-2]’ columns reflect posterior means of single-level regression coefficients;  
366 bracketed numbers are 89% HDI posterior credible intervals. Data for these analyses were  
367 collected as part of the exploratory phase of the study. Coefficients for the forced choice time  
368 spent task reflect log-odds. Subsamples are listed in parentheses; ‘Sona’ or ‘MTurk’ reflect  
369 where the sample completing the likelihood ratings was recruited from. Sona-2 was  
370 administered MTurk-sourced activities. All other samples were administered activities sourced  
371 from a different sample within the same population.

372

373

374

375

376

377 *Supplementary Table 4.* Association between social value scores and social decision  
378 preferences on one-shot tasks (confirmatory sample).

| Task (Subsample)              | Social Partner Pairs         | Person 1            | Person 2              |
|-------------------------------|------------------------------|---------------------|-----------------------|
| Dictator Game (Sona_MTurk)    | Parent (1), Friend (2)       | 0.579 [0.36, 0.84]  | -0.508 [-0.74, -0.26] |
| Dictator Game (Sona_MTurk)    | Parent (1), Acquaintance (2) | 0.284 [0.09, 0.47]  | -0.205 [-0.40, -0.01] |
| Dictator Game (Sona_MTurk)    | Friend (1), Acquaintance (2) | 0.198 [0.00, 0.40]  | -0.155 [-0.35, 0.04]  |
| Dictator Game (MTurk_MTurk)   | Parent (1), Friend (2)       | 0.172 [-0.00, 0.37] | -0.403 [-0.59, -0.22] |
| Dictator Game (MTurk_MTurk)   | Parent (1), Acquaintance (2) | 0.273 [0.11, 0.44]  | -0.317 [-0.48, -0.15] |
| Dictator Game (MTurk_MTurk)   | Friend (1), Acquaintance (2) | 0.202 [0.02, 0.39]  | -0.215 [-0.39, -0.02] |
| Dictator Game (Sona_Prolific) | Parent (1), Friend (2)       | 0.240 [0.12, 0.37]  | -0.221 [-0.36, -0.10] |

|                                     |                              |                      |                       |
|-------------------------------------|------------------------------|----------------------|-----------------------|
| Dictator Game (Sona_Prolific)       | Parent (1), Acquaintance (2) | 0.205 [0.09, 0.31]   | -0.262 [-0.37, -0.16] |
| Dictator Game (Sona_Prolific)       | Friend (1), Acquaintance (2) | 0.230 [0.13, 0.35]   | -0.356 [-0.46, -0.25] |
| Dictator Game (MTurk_Prolific)      | Parent (1), Friend (2)       | 0.201 [0.07, 0.32]   | -0.070 [-0.19, 0.05]  |
| Dictator Game (MTurk_Prolific)      | Parent (1), Acquaintance (2) | 0.248 [0.14, 0.36]   | -0.103 [-0.22, 0.00]  |
| Dictator Game (MTurk_Prolific)      | Friend (1), Acquaintance (2) | 0.167 [0.06, 0.29]   | -0.233 [-0.34, -0.12] |
| Forced Choice Time (Sona_MTurk)     | Parent (1), Friend (2)       | 0.570 [0.01, 1.10]   | -1.132 [-1.74, -0.54] |
| Forced Choice Time (Sona_MTurk)     | Parent (1), Acquaintance (2) | 0.828 [0.28, 1.39]   | -0.567 [-1.09, -0.06] |
| Forced Choice Time (Sona_MTurk)     | Friend (1), Acquaintance (2) | -0.247 [-1.37, 0.89] | -0.794 [-1.73, 0.24]  |
| Forced Choice Time (MTurk_MTurk)    | Parent (1), Friend (2)       | 0.282 [-0.15, 0.64]  | -0.743 [-1.17, -0.33] |
| Forced Choice Time (MTurk_MTurk)    | Parent (1), Acquaintance (2) | 0.962 [0.42, 1.42]   | -0.654 [-1.11, -0.22] |
| Forced Choice Time (MTurk_MTurk)    | Friend (1), Acquaintance (2) | 0.393 [-0.21, 1.08]  | 0.117 [-0.57, 0.78]   |
| Forced Choice Time (Sona_Prolific)  | Parent (1), Friend (2)       | 0.449 [0.17, 0.71]   | -0.480 [-0.75, -0.21] |
| Forced Choice Time (Sona_Prolific)  | Parent (1), Acquaintance (2) | 0.627 [0.29, 0.95]   | -0.817 [-1.12, -0.46] |
| Forced Choice Time (Sona_Prolific)  | Friend (1), Acquaintance (2) | 0.269 [-0.30, 0.82]  | -0.437 [-1.00, 0.10]  |
| Forced Choice Time (MTurk_Prolific) | Parent (1), Friend (2)       | 0.171 [-0.09, 0.42]  | -0.254 [-0.50, -0.00] |
| Forced Choice Time (MTurk_Prolific) | Parent (1), Acquaintance (2) | 0.278 [-0.00, 0.59]  | -0.359 [-0.65, -0.06] |
| Forced Choice Time (MTurk_Prolific) | Friend (1), Acquaintance (2) | 0.224 [-0.29, 0.76]  | -0.484 [-0.96, 0.01]  |

379 *Note.* Each row in the table represents a model wherein social value scores from two social  
380 partners were entered to predict a social decision preference on either dictator game or forced  
381 choice time spent items. 'Task' refers to paradigm used to capture social decision preferences.  
382 'Social Partner Pairs' refers to which social partners' social value scores were included as  
383 predictors in the analysis. Outcomes were coded such that a positive slope for Person 1 means  
384 increases in Person 1's social value score were related to a preference for Person 1 over  
385 Person 2 for the given task; a negative slope for Person 2 means increases in Person 2's social  
386 value score were related to a preference for Person 2 over Person 1. Unbracketed numbers in  
387 the 'Person [1-2]' columns reflect posterior means of single-level regression coefficients;  
388 bracketed numbers are 89% HDI posterior credible intervals. Data for these analyses were  
389 collected as part of the confirmatory phase of the study. Coefficients for the forced choice time  
390 spent task reflect log-odds. Subsamples are listed in parentheses; the first term denotes the  
391 population from which the activities were sourced; the second term denotes which population  
392 completed the likelihood ratings and other measures.

393

394

395

396

398 *Supplementary Table 5. Social value scores and social decision preferences on the multi-trial*  
 399 *social decision-making task (confirmatory sample)*

| Term                                                          | Monetary – SONA – Prolific        | Social – SONA – Prolific          | Monetary – MTurk – Prolific       | Social – MTurk – Prolific         |
|---------------------------------------------------------------|-----------------------------------|-----------------------------------|-----------------------------------|-----------------------------------|
| Parent vs Friend Preference x Parent Social Value             | 0.11 [0.07, 0.15]                 | 0.08 [0.04, 0.11]                 | 0.09 [0.06, 0.13]                 | 0.07 [0.04, 0.10]                 |
| Parent vs Friend Preference x Friend Social Value             | -0.09 [-0.12, -0.06]              | -0.10 [-0.13, -0.06]              | -0.05 [-0.08, -0.02]              | -0.08 [-0.11, -0.05]              |
| Parent vs Acquaintance Preference x Parent Social Value       | 0.15 [0.11, 0.19]                 | 0.11 [0.08, 0.15]                 | 0.09 [0.07, 0.13]                 | 0.08 [0.05, 0.11]                 |
| Parent vs Acquaintance Preference x Acquaintance Social Value | -0.10 [-0.14, -0.06]              | -0.11 [-0.14, -0.07]              | 0.00 [-0.03, 0.04]                | -0.05 [-0.09, -0.01]              |
| Friend vs Acquaintance Preference x Parent Social Value       | 0.10 [0.07, 0.12]                 | 0.13 [0.10, 0.16]                 | 0.06 [0.03, 0.09]                 | 0.08 [0.05, 0.12]                 |
| Friend vs Acquaintance Preference x Acquaintance Social Value | -0.09 [-0.13, -0.06]              | -0.12 [-0.16, -0.09]              | -0.02 [-0.06, 0.01]               | -0.05 [-0.09, -0.01]              |
| Number of participants, Number of decisions                   | <i>N</i> = 214, <i>n</i> = 12,559 | <i>N</i> = 210, <i>n</i> = 12,462 | <i>N</i> = 211, <i>n</i> = 12,431 | <i>N</i> = 200, <i>n</i> = 11,769 |

400 *Note.* Bracketed numbers are 89% HDI posterior credible intervals. Each entry into the table is a  
 401 coefficient from the hierarchical model described in this supplement. Specifically, the coefficient  
 402 is the cross-level interaction between a dummy code for trial type (indicating which relationship  
 403 partner is affected by a discounting option and which partner is affected by a delayed option)  
 404 and the social value score for a specific partner. Substantively, the coefficient represents the  
 405 expected difference in the log-odds of a favoring a given relationship partner over another  
 406 following a one-unit difference in the social value score. A positive slope was expected for any  
 407 terms involving parent social value and thus indicates a parent-over-other preference  
 408 strengthens with increasing social value for parent; a negative slope was expected for any terms  
 409 involving acquaintance social value and thus indicates an acquaintance-over-other preference  
 410 strengths with increasing social value for acquaintance; a negative slope was expected for  
 411 friend social value when pitted against parent, and a positive slope was expected pitted against  
 412 friend. The column headers describe first the type of reward at stake, followed by the sample  
 413 from which the activities were sourced, followed by the sample that completed the likelihood  
 414 ratings and other measures.



415

416

417

418 *Supplementary Table 6. Social value scores and social decision preferences on the multi-trial*  
 419 *social decision-making task (confirmatory sample)*

| Term                                                                   | Monetary –<br>(SONA – MTurk)    | Social – (SONA –<br>MTurk)      | Monetary –<br>(MTurk – MTurk)   | Social – (MTurk –<br>MTurk)     |
|------------------------------------------------------------------------|---------------------------------|---------------------------------|---------------------------------|---------------------------------|
| Parent vs Friend<br>Preference x Parent<br>Social Value                | 0.13 [0.06, 0.20]               | 0.19 [0.11, 0.26]               | 0.09 [0.04, 0.13]               | 0.10 [0.05, 0.16]               |
| Parent vs Friend<br>Preference x Friend<br>Social Value                | -0.10 [-0.16, -0.04]            | -0.19 [-0.25, -0.12]            | -0.09 [-0.13, -0.04]            | -0.13 [-0.18, -0.07]            |
| Parent vs Acquaintance<br>Preference x Parent<br>Social Value          | 0.13 [0.07, 0.20]               | 0.27 [0.16, 0.37]               | 0.16 [0.10, 0.22]               | 0.14 [0.08, 0.20]               |
| Parent vs Acquaintance<br>Preference x<br>Acquaintance Social<br>Value | -0.03 [-0.10, 0.04]             | -0.18 [-0.30, -0.05]            | -0.14 [-0.21, -0.07]            | -0.08 [-0.16, -0.01]            |
| Friend vs Acquaintance<br>Preference x Parent<br>Social Value          | 0.11 [0.05, 0.17]               | 0.19 [0.12, 0.25]               | 0.13 [0.07, 0.18]               | 0.14 [0.08, 0.20]               |
| Friend vs Acquaintance<br>Preference x<br>Acquaintance Social<br>Value | 0.02 [-0.05, 0.10]              | -0.08 [-0.16, 0.00]             | -0.09 [-0.16, -0.02]            | -0.09 [-0.16, -0.02]            |
| Number of participants,<br>Number of decisions                         | <i>N</i> = 67, <i>n</i> = 3,924 | <i>N</i> = 67, <i>n</i> = 3,929 | <i>N</i> = 92, <i>n</i> = 5,460 | <i>N</i> = 85, <i>n</i> = 5,006 |

420 *Note.* Bracketed numbers are 89% HDI posterior credible intervals. Each entry into the table is a  
 421 coefficient from the hierarchical model described in this supplement. Specifically, the coefficient  
 422 is the cross-level interaction between a dummy code for trial type (indicating which relationship  
 423 partner is affected by a discounting option and which partner is affected by a delayed option)  
 424 and the social value score for a specific partner. Substantively, the coefficient represents the  
 425 expected difference in the log-odds of a favoring a given relationship partner over another  
 426 following a one-unit difference in the social value score. A positive slope was expected for any  
 427 terms involving parent social value and thus indicates a parent-over-other preference  
 428 strengthens with increasing social value for parent; a negative slope was expected for any terms  
 429 involving acquaintance social value and thus indicates an acquaintance-over-other preference  
 430 strengths with increasing social value for acquaintance; a negative slope was expected for

431 friend social value when pitted against parent, and a positive slope was expected pitted against  
 432 friend. The column headers describe first the type of reward at stake, followed by the sample  
 433 from which the activities were sourced, followed by the sample that completed the likelihood  
 434 ratings and other measures.

435

436

437

438

439 *Supplementary Table 7. Social value scores predict affiliative social behaviors (SONA-derived*  
 440 *activities, MTurk sample).*

| Behavior      | Social Partner Pairs         | Person 1            | Person 2              |
|---------------|------------------------------|---------------------|-----------------------|
| Advice        | Parent (1), Friend (2)       | 0.713 [0.20, 1.27]  | -1.462 [-2.05, -0.88] |
| Advice        | Parent (1), Acquaintance (2) | 0.998 [0.40, 1.54]  | -0.963 [-1.46, -0.44] |
| Advice        | Friend (1), Acquaintance (2) | 0.846 [0.10, 1.68]  | -0.556 [-1.29, 0.15]  |
| Celebration   | Parent (1), Friend (2)       | 0.184 [-0.33, 0.72] | -0.569 [-1.09, -0.03] |
| Celebration   | Parent (1), Acquaintance (2) | 0.953 [0.44, 1.51]  | -0.508 [-0.94, -0.04] |
| Celebration   | Friend (1), Acquaintance (2) | 0.917 [0.06, 1.68]  | 0.474 [-0.30, 1.28]   |
| Positive News | Parent (1), Friend (2)       | 1.144 [0.57, 1.73]  | -1.230 [-1.77, -0.61] |
| Positive News | Parent (1), Acquaintance (2) | 1.536 [0.85, 2.17]  | -0.438 [-0.97, 0.08]  |
| Positive News | Friend (1), Acquaintance (2) | 0.700 [-0.09, 1.48] | 0.282 [-0.46, 1.11]   |
| Negative News | Parent (1), Friend (2)       | 0.687 [0.16, 1.17]  | -0.643 [-1.22, -0.18] |
| Negative News | Parent (1), Acquaintance (2) | 1.285 [0.66, 1.82]  | -0.953 [-1.47, -0.48] |
| Negative News | Friend (1), Acquaintance (2) | 1.180 [0.48, 1.98]  | 0.242 [-0.50, 1.00]   |
| Lend Money    | Parent (1), Friend (2)       | 1.108 [0.51, 1.67]  | -0.590 [-1.12, -0.03] |
| Lend Money    | Parent (1), Acquaintance (2) | 1.786 [1.08, 2.51]  | -0.632 [-1.17, -0.08] |
| Lend Money    | Friend (1), Acquaintance (2) | 0.761 [0.11, 1.53]  | 0.300 [-0.44, 1.05]   |
| Have Dinner   | Parent (1), Friend (2)       | 0.052 [-0.46, 0.66] | -0.634 [-1.18, -0.07] |
| Have Dinner   | Parent (1), Acquaintance (2) | 0.433 [-0.01, 0.90] | -0.795 [-1.29, -0.40] |
| Have Dinner   | Friend (1), Acquaintance (2) | 1.127 [0.41, 1.87]  | -0.278 [-0.97, 0.36]  |

441 *Note.* Each row in the table represents a model wherein social value scores from two social  
 442 partners were entered to predict a forced choice between the two social partners for a given  
 443 type social affiliative behavior (e.g., which of the social partners would participants choose to  
 444 seek advice from, be more likely to lend more to). ‘Behavior’ refers to the forced choice affiliative

445 behavior being predicted. The full text for each question can be accessed in the main document.  
446 'Person Pairs' refers to which social partners' social value scores were included as predictors in  
447 the analysis. Outcomes were binary and coded such that a positive slope for Person 1 means  
448 increases in Person 1's social value score were related to choosing Person 1 over Person 2 for  
449 the given affiliative behavior; a negative slope for Person 2 means increases in Person 2's  
450 social value score were related to choosing Person 2 over Person 1. Unbracketed numbers in  
451 the 'Person [1-2]' columns reflect posterior means of single-level regression coefficients;  
452 bracketed numbers are 89% HDI posterior credible intervals. Data for these analyses were  
453 collected as part of the confirmatory phase of the study. Coefficients reflect log-odds.

454  
455

*Supplementary Table 8. Social value scores predict affiliative social behaviors (MTurk-derived activities, MTurk sample).*

| Behavior      | Social Partner Pairs         | Person 1             | Person 2              |
|---------------|------------------------------|----------------------|-----------------------|
| Advice        | Parent (1), Friend (2)       | 0.241 [-0.15, 0.62]  | -0.972 [-1.40, -0.54] |
| Advice        | Parent (1), Acquaintance (2) | 0.590 [0.13, 1.04]   | -0.934 [-1.36, -0.49] |
| Advice        | Friend (1), Acquaintance (2) | 0.276 [-0.27, 0.92]  | 0.210 [-0.45, 0.84]   |
| Celebration   | Parent (1), Friend (2)       | -0.007 [-0.37, 0.41] | -0.112 [-0.52, 0.25]  |
| Celebration   | Parent (1), Acquaintance (2) | 1.204 [0.68, 1.68]   | -0.712 [-1.15, -0.27] |
| Celebration   | Friend (1), Acquaintance (2) | 0.597 [-0.18, 1.31]  | -0.175 [-0.88, 0.61]  |
| Positive News | Parent (1), Friend (2)       | 0.343 [-0.06, 0.72]  | -0.508 [-0.92, -0.13] |
| Positive News | Parent (1), Acquaintance (2) | 0.824 [0.30, 1.29]   | -0.561 [-1.02, -0.16] |
| Positive News | Friend (1), Acquaintance (2) | 0.456 [-0.22, 1.03]  | -0.294 [-0.92, 0.33]  |
| Negative News | Parent (1), Friend (2)       | 0.287 [-0.13, 0.63]  | -0.587 [-0.97, -0.19] |
| Negative News | Parent (1), Acquaintance (2) | 0.583 [0.16, 0.95]   | -0.786 [-1.21, -0.40] |
| Negative News | Friend (1), Acquaintance (2) | 0.644 [0.04, 1.21]   | -0.486 [-1.03, 0.05]  |
| Lend Money    | Parent (1), Friend (2)       | 0.741 [0.29, 1.17]   | -0.735 [-1.17, -0.29] |
| Lend Money    | Parent (1), Acquaintance (2) | 0.932 [0.41, 1.43]   | -0.730 [-1.18, -0.28] |
| Lend Money    | Friend (1), Acquaintance (2) | 0.317 [-0.25, 0.86]  | -0.594 [-1.12, -0.04] |
| Have Dinner   | Parent (1), Friend (2)       | 0.094 [-0.31, 0.53]  | -0.638 [-1.07, -0.23] |
| Have Dinner   | Parent (1), Acquaintance (2) | 0.739 [0.31, 1.16]   | -0.773 [-1.19, -0.37] |
| Have Dinner   | Friend (1), Acquaintance (2) | 0.895 [0.16, 1.65]   | -0.504 [-1.21, 0.20]  |

456 *Note.* Each row in the table represents a model wherein social value scores from two social  
457 partners were entered to predict a forced choice between the two social partners for a given  
458 type social affiliative behavior (e.g., which of the social partners would participants choose to  
459 seek advice from, be more likely to lend more to). ‘Behavior’ refers to the forced choice affiliative  
460 behavior being predicted. The full text for each question can be accessed in the main document.  
461 ‘Social Partner Pairs’ refers to which social partners’ social value scores were included as  
462 predictors in the analysis. Outcomes were binary and coded such that a positive slope for  
463 Person 1 means increases in Person 1’s social value score were related to choosing Person 1  
464 over Person 2 for the given affiliative behavior; a negative slope for Person 2 means increases  
465 in Person 2’s social value score were related to choosing Person 2 over Person 1. Unbracketed  
466 numbers in the ‘Person [1-2]’ columns reflect posterior means of single-level regression  
467 coefficients; bracketed numbers are 89% HDI posterior credible intervals. Data for these  
468 analyses were collected as part of the confirmatory phase of the study. Coefficients reflect log-  
469 odds.

470  
 471  
 472  
 473  
 474  
 475  
 476  
 477  
 478  
 479

*Supplementary Table 9. Social value scores predict affiliative social behaviors (SONA-derived activities, Prolific sample).*

| Behavior      | Social Partner Pairs         | Person 1             | Person 2              |
|---------------|------------------------------|----------------------|-----------------------|
| Advice        | Parent (1), Friend (2)       | 0.323 [0.05, 0.57]   | -0.147 [-0.41, 0.11]  |
| Advice        | Parent (1), Acquaintance (2) | 0.570 [0.25, 0.91]   | -0.758 [-1.07, -0.42] |
| Advice        | Friend (1), Acquaintance (2) | -0.004 [-0.53, 0.53] | -0.479 [-0.93, 0.01]  |
| Celebration   | Parent (1), Friend (2)       | 0.510 [0.22, 0.79]   | -0.304 [-0.59, -0.04] |
| Celebration   | Parent (1), Acquaintance (2) | 0.635 [0.28, 1.03]   | -0.642 [-0.99, -0.27] |
| Celebration   | Friend (1), Acquaintance (2) | 0.212 [-0.51, 0.95]  | -0.134 [-0.85, 0.61]  |
| Positive News | Parent (1), Friend (2)       | 0.276 [0.03, 0.54]   | -0.144 [-0.40, 0.12]  |
| Positive News | Parent (1), Acquaintance (2) | 1.119 [0.68, 1.52]   | -0.587 [-1.01, -0.20] |
| Positive News | Friend (1), Acquaintance (2) | 0.271 [-0.31, 0.88]  | -0.024 [-0.64, 0.56]  |
| Negative News | Parent (1), Friend (2)       | -0.057 [-0.31, 0.19] | -0.127 [-0.38, 0.12]  |
| Negative News | Parent (1), Acquaintance (2) | 0.472 [0.17, 0.75]   | -0.577 [-0.86, -0.28] |
| Negative News | Friend (1), Acquaintance (2) | 0.658 [0.18, 1.13]   | -0.541 [-1.02, -0.07] |
| Lend Money    | Parent (1), Friend (2)       | 0.586 [0.28, 0.92]   | -0.372 [-0.69, -0.06] |
| Lend Money    | Parent (1), Acquaintance (2) | 0.781 [0.36, 1.21]   | -0.822 [-1.22, -0.39] |
| Lend Money    | Friend (1), Acquaintance (2) | -0.218 [-0.67, 0.31] | -0.359 [-0.80, 0.10]  |
| Have Dinner   | Parent (1), Friend (2)       | 0.190 [-0.11, 0.47]  | -0.428 [-0.72, -0.15] |
| Have Dinner   | Parent (1), Acquaintance (2) | 0.486 [0.18, 0.78]   | -0.990 [-1.28, -0.69] |
| Have Dinner   | Friend (1), Acquaintance (2) | 0.378 [-0.15, 0.88]  | -0.728 [-1.21, -0.24] |

480 *Note.* Each row in the table represents a model wherein social value scores from two social  
 481 partners were entered to predict a forced choice between the two social partners for a given

482 type social affiliative behavior (e.g., which of the social partners would participants choose to  
 483 seek advice from, be more likely to lend more to). ‘Behavior’ refers to the forced choice affiliative  
 484 behavior being predicted. The full text for each question can be accessed in the main document.  
 485 ‘Social Partner Pairs’ refers to which social partners’ social value scores were included as  
 486 predictors in the analysis. Outcomes were binary and coded such that a positive slope for  
 487 Person 1 means increases in Person 1’s social value score were related to choosing Person 1  
 488 over Person 2 for the given affiliative behavior; a negative slope for Person 2 means increases  
 489 in Person 2’s social value score were related to choosing Person 2 over Person 1. Unbracketed  
 490 numbers in the ‘Person [1-2]’ columns reflect posterior means of single-level regression  
 491 coefficients; bracketed numbers are 89% HDI posterior credible intervals. Data for these  
 492 analyses were collected as part of the confirmatory phase of the study. Coefficients reflect log-  
 493 odds.

494  
 495  
 496  
 497  
 498  
 499  
 500  
 501

502 *Supplementary Table 10. Social value scores predict affiliative social behaviors (MTurk-derived*  
 503 *activities, Prolific sample).*

| Behavior      | Social Partner Pairs         | Person 1             | Person 2              |
|---------------|------------------------------|----------------------|-----------------------|
| Advice        | Parent (1), Friend (2)       | 0.130 [-0.11, 0.37]  | -0.248 [-0.48, 0.02]  |
| Advice        | Parent (1), Acquaintance (2) | 0.113 [-0.19, 0.44]  | -0.154 [-0.46, 0.16]  |
| Advice        | Friend (1), Acquaintance (2) | 0.331 [-0.21, 0.86]  | -0.221 [-0.75, 0.31]  |
| Celebration   | Parent (1), Friend (2)       | 0.122 [-0.12, 0.38]  | -0.036 [-0.29, 0.22]  |
| Celebration   | Parent (1), Acquaintance (2) | -0.039 [-0.38, 0.32] | -0.231 [-0.56, 0.07]  |
| Celebration   | Friend (1), Acquaintance (2) | 0.007 [-0.70, 0.74]  | -0.378 [-1.03, 0.28]  |
| Positive News | Parent (1), Friend (2)       | 0.452 [0.17, 0.72]   | -0.345 [-0.61, -0.09] |
| Positive News | Parent (1), Acquaintance (2) | 0.361 [-0.11, 0.84]  | -0.252 [-0.72, 0.20]  |
| Positive News | Friend (1), Acquaintance (2) | 0.123 [-0.43, 0.61]  | -0.360 [-0.83, 0.09]  |
| Negative News | Parent (1), Friend (2)       | 0.245 [-0.02, 0.49]  | -0.163 [-0.41, 0.08]  |
| Negative News | Parent (1), Acquaintance (2) | 0.058 [-0.23, 0.34]  | -0.260 [-0.52, 0.02]  |

|               |                              |                     |                       |
|---------------|------------------------------|---------------------|-----------------------|
| Negative News | Friend (1), Acquaintance (2) | 0.130 [-0.29, 0.55] | -0.267 [-0.67, 0.10]  |
| Lend Money    | Parent (1), Friend (2)       | 0.637 [0.34, 0.94]  | -0.373 [-0.65, -0.09] |
| Lend Money    | Parent (1), Acquaintance (2) | 0.137 [-0.30, 0.59] | -0.027 [-0.48, 0.45]  |
| Lend Money    | Friend (1), Acquaintance (2) | 0.329 [-0.13, 0.81] | -0.461 [-0.88, -0.01] |
| Have Dinner   | Parent (1), Friend (2)       | 0.111 [-0.14, 0.34] | -0.126 [-0.37, 0.12]  |
| Have Dinner   | Parent (1), Acquaintance (2) | 0.008 [-0.30, 0.31] | -0.200 [-0.47, 0.11]  |
| Have Dinner   | Friend (1), Acquaintance (2) | 0.169 [-0.30, 0.62] | -0.451 [-0.87, -0.03] |

504 *Note.* Each row in the table represents a model wherein social value scores from two social  
505 partners were entered to predict a forced choice between the two social partners for a given  
506 type social affiliative behavior (e.g., which of the social partners would participants choose to  
507 seek advice from, be more likely to lend more to). ‘Behavior’ refers to the forced choice affiliative  
508 behavior being predicted. The full text for each question can be accessed in the main document.  
509 ‘Person Pairs’ refers to which social partners’ social value scores were included as predictors in  
510 the analysis. Outcomes were binary and coded such that a positive slope for Person 1 means  
511 increases in Person 1’s social value score were related to choosing Person 1 over Person 2 for  
512 the given affiliative behavior; a negative slope for Person 2 means increases in Other 2’s social  
513 value score were related to choosing Person 2 over Person 1. Unbracketed numbers in the  
514 ‘Person [1-2]’ columns reflect posterior means of single-level regression coefficients; bracketed  
515 numbers are 89% HDI posterior credible intervals. Data for these analyses were collected as  
516 part of the confirmatory phase of the study. Coefficients reflect log-odds.

517

518

519

520

521

522

523

524

525 *Supplementary Table 11.* Paired differences in social value scores and relationship quality  
526 scores (confirmatory sample)

| Comparison (Subsample)             | Social Value         | Relationship Quality |
|------------------------------------|----------------------|----------------------|
| Parent – Friend (Sona_MTurk)       | -0.32 [-0.48, -0.16] | -0.70 [-0.88, -0.53] |
| Parent – Acquaintance (Sona_MTurk) | 0.31 [0.15, 0.46]    | 0.01 [-0.15, 0.15]   |
| Friend – Acquaintance (Sona_MTurk) | 0.50 [0.32, 0.66]    | 0.88 [0.68, 1.05]    |

|                                        |                      |                      |
|----------------------------------------|----------------------|----------------------|
| Parent – Friend (MTurk_MTurk)          | 0.12 [-0.03, 0.27]   | -0.64 [-0.80, -0.48] |
| Parent – Acquaintance (MTurk_MTurk)    | 0.42 [0.27, 0.57]    | 0.07 [-0.09, 0.20]   |
| Friend – Acquaintance (MTurk_MTurk)    | 0.38 [0.23, 0.53]    | 0.82 [0.67, 1.00]    |
| Parent – Friend (Sona_Prolific)        | -0.25 [-0.35, -0.15] | -0.79 [-0.90, -0.67] |
| Parent – Acquaintance (Sona_Prolific)  | 0.45 [0.35, 0.56]    | 0.02 [-0.08, 0.13]   |
| Friend – Acquaintance (Sona_Prolific)  | 0.70 [0.58, 0.81]    | 0.98 [0.85, 1.10]    |
| Parent – Friend (MTurk_Prolific)       | 0.17 [0.07, 0.28]    | -0.77 [-0.89, -0.65] |
| Parent – Acquaintance (MTurk_Prolific) | 0.75 [0.63, 0.88]    | 0.16 [0.05, 0.26]    |
| Friend – Acquaintance (MTurk_Prolific) | 0.60 [0.49, 0.72]    | 1.12 [0.98, 1.26]    |

---

527 *Note.* Brackets represent 89% HDIs of posterior probability distributions. Subsamples are listed  
528 in parentheses; the first term denotes the population from which the activities were sourced, the  
529 latter denotes which population completed the likelihood ratings and other measures.  
530 'Relationship Quality' refers to mean scores from the IPPA.

531

532

533

534

535

536

537

538

539

540

541

542

543

544

545

546

547



548 *Supplementary Table 12. Associations between outcome variables and social value scores,*  
 549 *controlling for unit-weighted likelihood ratings (Confirmatory sample, SONA-sourced activities).*

| Parent                                   |                    | Friend                                   |                     | Acquaintance                                   |                     |
|------------------------------------------|--------------------|------------------------------------------|---------------------|------------------------------------------------|---------------------|
| <i>Relationship Quality</i>              |                    |                                          |                     |                                                |                     |
| Social Value Score - Parent              | 0.189 [0.11, 0.28] | Social Value Score - Friend              | 0.197 [0.14, 0.26]  | Social Value Score – Acquaintance              | 0.174 [0.11, 0.24]  |
| Unit Weighted Likelihood Rating - Parent | 0.444 [0.36, 0.52] | Unit Weighted Likelihood Rating - Friend | 0.226 [0.17, 0.28]  | Unit Weighted Likelihood Rating – Acquaintance | 0.262 [0.20, 0.32]  |
| <i>Social Loss Aversion</i>              |                    |                                          |                     |                                                |                     |
| Social Value Score - Parent              | 1.794 [0.25, 3.13] | Social Value Score - Friend              | 1.307 [-0.01, 2.55] | Social Value Score – Acquaintance              | 1.787 [0.32 3.20]   |
| Unit Weighted Likelihood Rating - Parent | 2.779 [1.37, 4.24] | Unit Weighted Likelihood Rating - Friend | 1.237 [0.89, 3.55]  | Unit Weighted Likelihood Rating – Acquaintance | 3.621 [2.18, 5.19]  |
| <i>Dictator Game</i>                     |                    |                                          |                     |                                                |                     |
| Social Value: Par - Fri                  | 0.050 [0.01, 0.08] | Social Value: Par – Acq                  | 0.012 [-0.02, 0.05] | Social Value: Fri – Acq                        | 0.039 [0.01, 0.06]  |
| Unit Weighted Likelihood: Par - Fri      | 0.077 [0.04, 0.12] | Unit Weighted Likelihood: Par - Acq      | 0.140 [0.10, 0.19]  | Unit Weighted Likelihood: Fri - Acq            | 0.085 [0.05, 0.12]  |
| <i>Forced Choice Time Spent</i>          |                    |                                          |                     |                                                |                     |
| Social Value: Par - Fri                  | 0.475 [0.18, 0.77] | Social Value: Par – Acq                  | 0.310 [-0.17, 0.79] | Social Value: Fri – Acq                        | 0.382 [-0.28, 1.02] |
| Unit Weighted Likelihood: Par - Fri      | 0.822 [0.45, 1.18] | Unit Weighted Likelihood: Par - Acq      | 1.726 [1.11, 2.34]  | Unit Weighted Likelihood: Fri - Acq            | 0.860 [0.07, 1.69]  |

550

551

552 *Note.* Bracketed numbers are 89% HDI posterior credible intervals. Each entry into the table is a  
 553 coefficient from a regression model (logistic for the *forced choice time spent* item). Positive  
 554 slopes for the first two outcomes (relationship quality, social loss aversion) indicate a direct  
 555 relationship between the predictor and outcome. The predictors for the latter two outcomes  
 556 (*dictator game* and *forced choice time spent*) are a difference score between social value scores

557 or unit weighted likelihood ratings between two known others. The label for such difference  
558 scores reflects the coding of the predictor; a positive value indicates a greater value for Person  
559 1 relative to Person 2 and vice versa. As with other comparable analyses, outcomes were  
560 coded such that a positive slope for Person 1 means increases in Person 1's social value score  
561 were related to a preference for Person 1 over Person 2 for the given task; a negative slope for  
562 Person 2 means increases in Person 2's social value score were related to a preference for  
563 Person 2 over Person 1. These results reflect confirmatory phase data collected from prolific  
564 with SONA-sourced activities.

565

566

567

568

569

570

571

572

573

574

575

576

577

578

579

580

581

582

583

584

585

586

587

588

589

590

| Parent                                   |                     | Friend                                   |                     | Acquaintance                                   |                     |
|------------------------------------------|---------------------|------------------------------------------|---------------------|------------------------------------------------|---------------------|
| <i>Relationship Quality</i>              |                     |                                          |                     |                                                |                     |
| Social Value Score - Parent              | 0.089 [0.00, 0.18]  | Social Value Score - Friend              | 0.123 [0.07, 0.18]  | Social Value Score – Acquaintance              | 0.039 [-0.04, 0.11] |
| Unit Weighted Likelihood Rating - Parent | 0.430 [0.34, 0.52]  | Unit Weighted Likelihood Rating - Friend | 0.207 [0.15, 0.27]  | Unit Weighted Likelihood Rating – Acquaintance | 0.407 [0.33, 0.48]  |
| <i>Social Loss Aversion</i>              |                     |                                          |                     |                                                |                     |
| Social Value Score - Parent              | 1.419 [-0.06, 2.71] | Social Value Score - Friend              | 1.418 [0.16, 2.75]  | Social Value Score – Acquaintance              | 1.078 [-0.39, 2.43] |
| Unit Weighted Likelihood Rating - Parent | 2.589 [1.24, 3.94]  | Unit Weighted Likelihood Rating - Friend | 2.545 [1.12, 3.89]  | Unit Weighted Likelihood Rating – Acquaintance | 3.415 [1.99, 4.96]  |
| <i>Dictator Game</i>                     |                     |                                          |                     |                                                |                     |
| Social Value: Par - Fri                  | 0.026 [-0.01, 0.06] | Social Value: Par – Acq                  | 0.024 [0.00, 0.05]  | Social Value: Fri – Acq                        | 0.035 [0.02, 0.06]  |
| Unit Weighted Likelihood: Par - Fri      | 0.095 [0.06, 0.13]  | Unit Weighted Likelihood: Par - Acq      | 0.086 [0.05, 0.12]  | Unit Weighted Likelihood: Fri - Acq            | 0.062 [0.03, 0.09]  |
| <i>Forced Choice Time Spent</i>          |                     |                                          |                     |                                                |                     |
| Social Value: Par - Fri                  | 0.106 [-0.16, 0.35] | Social Value: Par – Acq                  | 0.094 [-0.21, 0.44] | Social Value: Fri – Acq                        | 0.126 [-0.41, 0.66] |
| Unit Weighted Likelihood: Par - Fri      | 0.923 [0.56, 1.30]  | Unit Weighted Likelihood: Par - Acq      | 1.236 [0.78, 1.72]  | Unit Weighted Likelihood: Fri - Acq            | 1.484 [0.65, 2.27]  |

592 *Supplementary Table 13.* Associations between outcome variables and social value scores,  
593 controlling for unit-weighted likelihood ratings (Confirmatory sample, MTurk-sourced activities).

594 *Note.* Bracketed numbers are 89% HDI posterior credible intervals. Each entry into the table is a  
595 coefficient from a regression model (logistic for the *forced choice time spent* item). Positive  
596 slopes for the first two outcomes (relationship quality, social loss aversion) indicate a direct  
597 relationship between the predictor and outcome. The predictors for the latter two outcomes  
598 (*dictator game* and *forced choice time spent*) are a difference score between social value scores  
599 or unit weighted likelihood ratings between two known others. The label for such difference

600 scores reflects the coding of the predictor; a positive value indicates a greater value for Person  
601 1 relative to Person 2 and vice versa. As with other comparable analyses, outcomes were  
602 coded such that a positive slope for Person 1 means increases in Person 1's social value score  
603 were related to a preference for Person 1 over Person 2 for the given task; a negative slope for  
604 Person 2 means increases in Person 2's social value score were related to a preference for  
605 Person 2 over Person 1. These results reflect confirmatory phase data collected from prolific  
606 with MTurk-sourced activities.

607

608

609

610

611

612

613

614

615

616

617

618

619

620

621

622

623

624

625

626

627

628

629

630

631

632

633

634

635

636 *Supplementary Figure 1. Activity Weights*

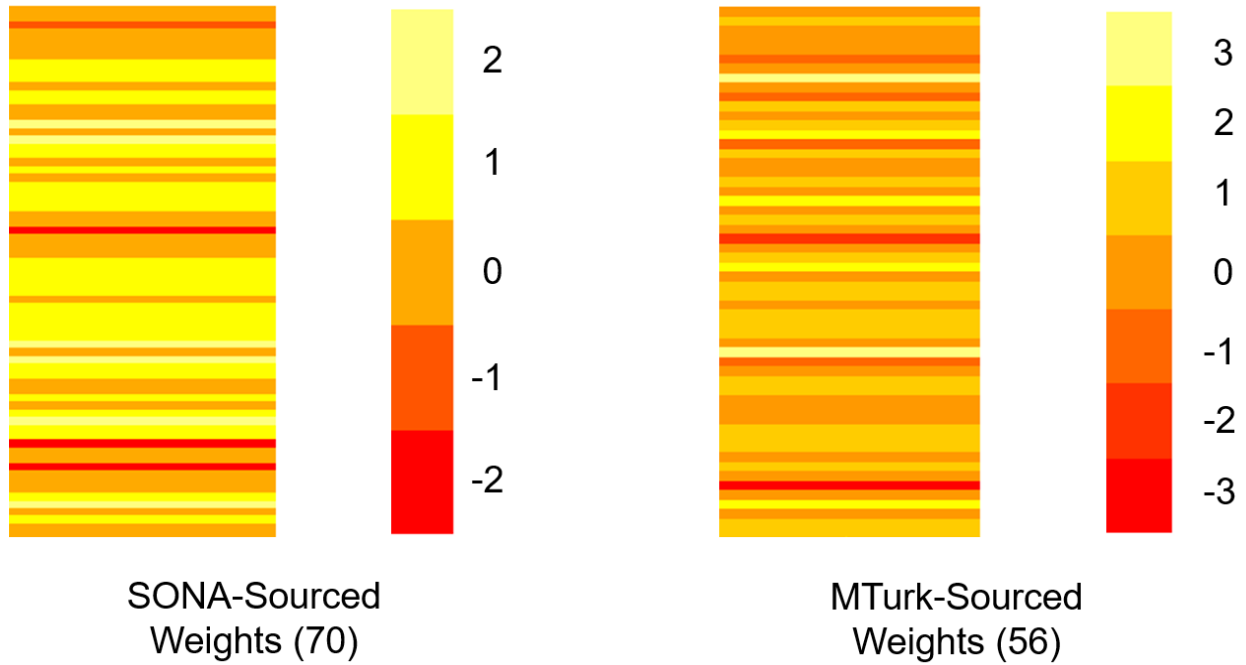

637

638 *Note.* SONA-Sourced Weights refers to weights of activities ( $n = 70$  activities) that were sourced  
639 from the UCLA undergraduate psychology subject pool (SONA); Mturk-Sourced Weights refers  
640 to weights of activities ( $n = 56$  activities) that were sourced from Amazon's Mechanical Turk.  
641 Note the range and variability in weights.

642

643

644

645

646

647

648

649

650

651

652

653

654

655

656

657 *Supplementary Figure 2. Example trend of paired differences in social value scores between*  
658 *parents, friend, and acquaintances.*

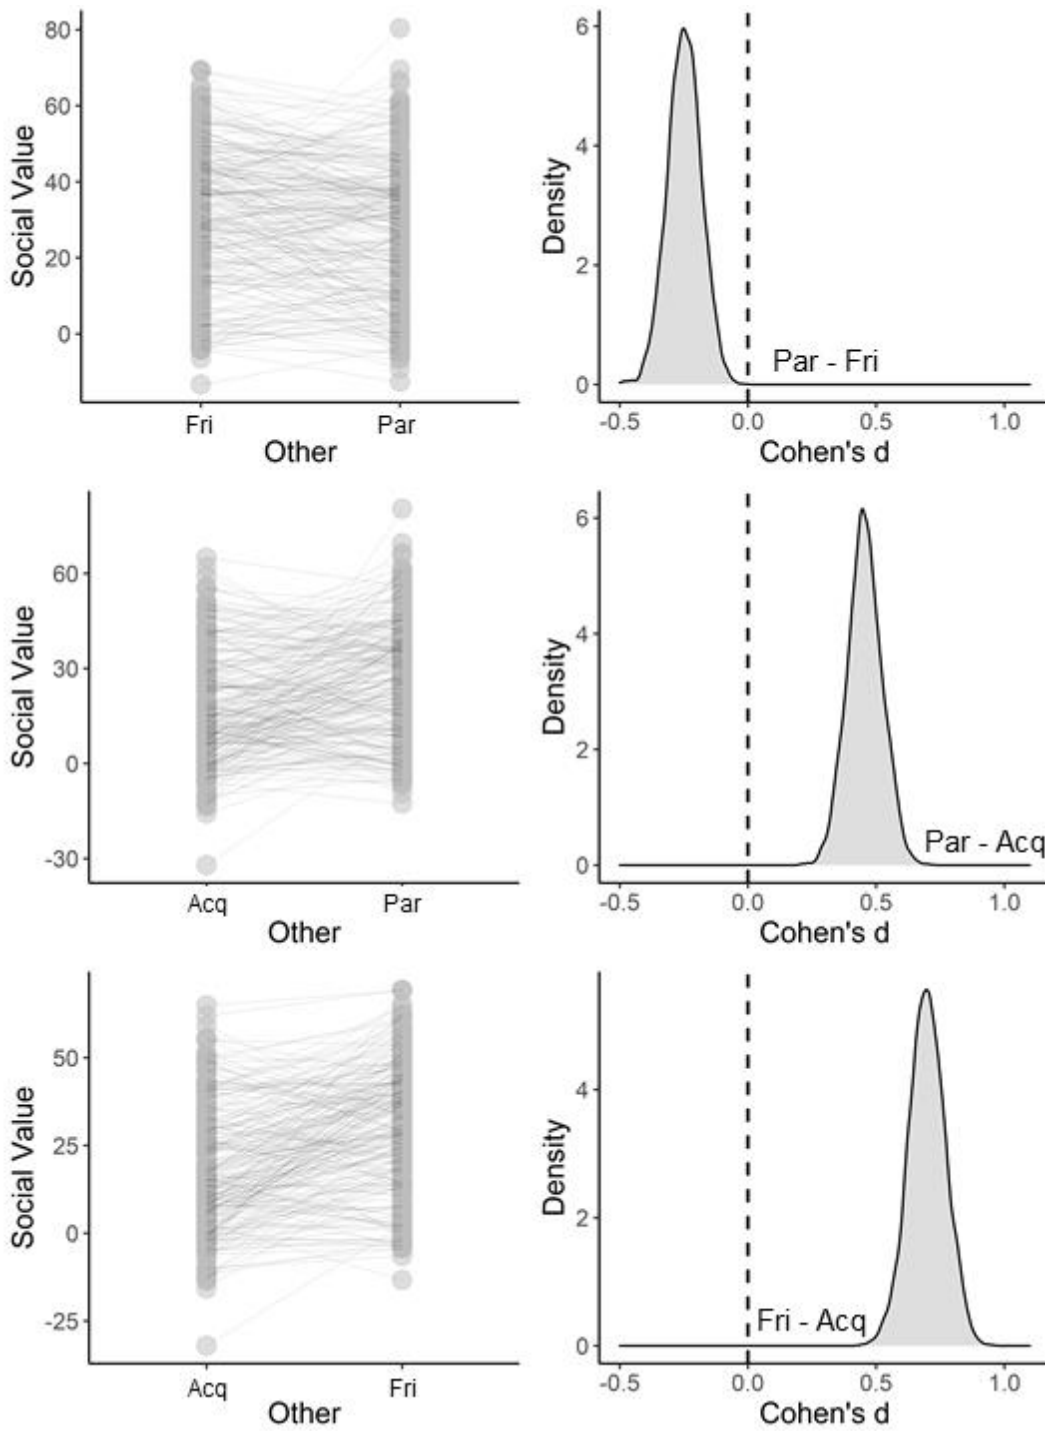

659

660 *Note.* The left column of plots shows paired differences between pairs of social partners. The  
661 right column depicts posterior distributions of paired differences (in Cohen's *d* metric). The  
662 hashed vertical line is centered over zero. Each column, respectively, shows paired differences  
663 between parent – friend, parent – acquaintance, and friend – acquaintance. Data for this  
664 visualization were drawn from confirmatory phase (prolific sample, SONA-sourced weights).  
665 'Par' refers to parent, 'Fri' refers to friend, and 'Acq' refers to acquaintance. 'Density' refers to  
666 the mass of the posterior distribution. The sample size for this analysis is  $N = 233$ .

667

668

669

670

671

672

673

674

675

676

677

678

679

680

681

682

683

684

685

686

687

688

689

690

691

692

693

694 *Supplementary Figure 3. Associations between social value scores and choice preferences*  
695 *when controlling for relationship quality and social loss aversion (Confirmatory sample, SONA-*  
696 *sourced activities).*

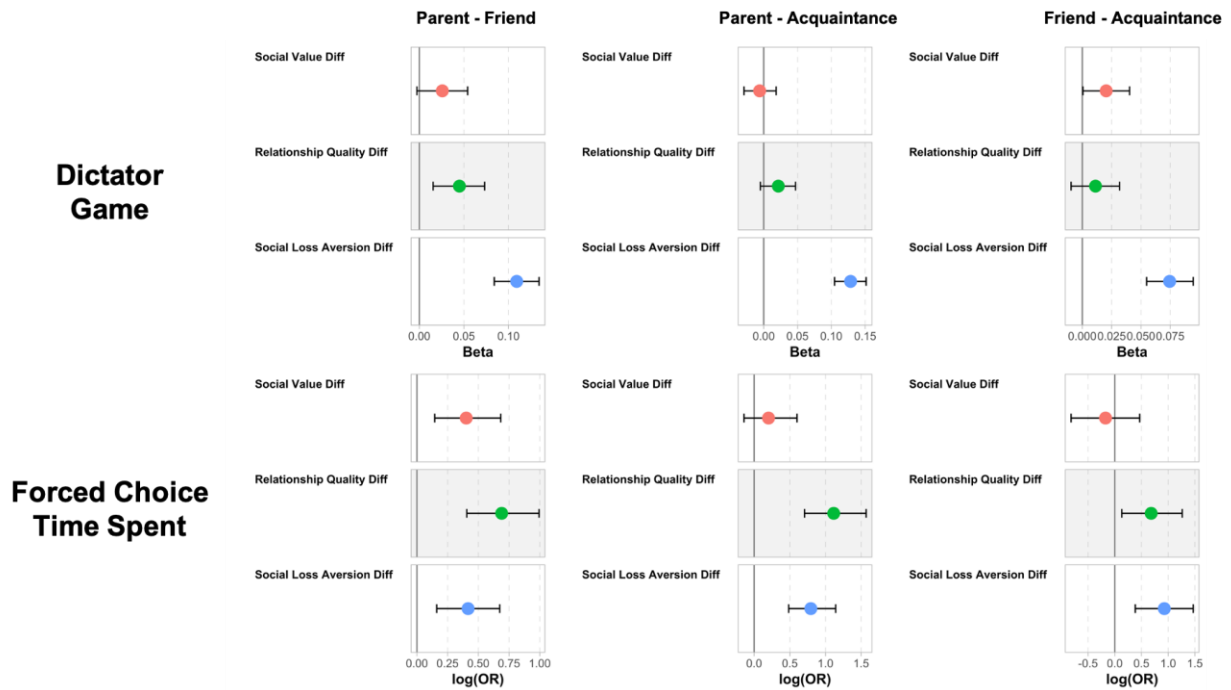

697

698 *Note.* ‘Forced Choice Spend Time’ refers to a one-shot, binary question asking participants to  
699 choose one of two social partners with whom they would rather spend a free afternoon. ‘Diff’  
700 references to a difference score taken between the listed metric (social value scores,  
701 relationship quality, social loss aversion) for the two familiar others labeled at the top of each  
702 column (in the order listed, e.g., parent – friend means friend scores on a given metric were  
703 subtracted from parent scores). All predictors were standardized. Dots reflect coefficients from  
704 Bayesian regression and bars reflect 89% HDIs. Evidence was judged to be robust if the HDI  
705 did not include 0 or the HDI fell outside of the Region of Practical Equivalence (ROPE) and  
706 moderate if part of the HDI fell outside of ROPE (see “Inferential Criteria” section of the main  
707 text). ROPE was defined as the range between -0.1 to 0.1. Here, when controlling for  
708 relationship quality and social loss aversion, there was robust evidence that social value scores  
709 were associated with choice preferences regarding whether participants would rather spend  
710 time with their parent or friend and moderate evidence that social value scores were associated  
711 with choice preferences regarding whether participants would rather spend time with their  
712 parent or acquaintance and whether they would rather spend time with their friend or  
713 acquaintance. Comparable evidence was not found for choices in the dictator game. The  
714 sample size for this analysis is  $N = 315$ .

715



716

717

718

719 *Supplementary Figure 4. Associations between social value scores and choice preferences*  
720 *when controlling for relationship quality and social loss aversion (Confirmatory sample, MTurk-*  
721 *sourced activities).*

722

723

724

725

726

727

728

729

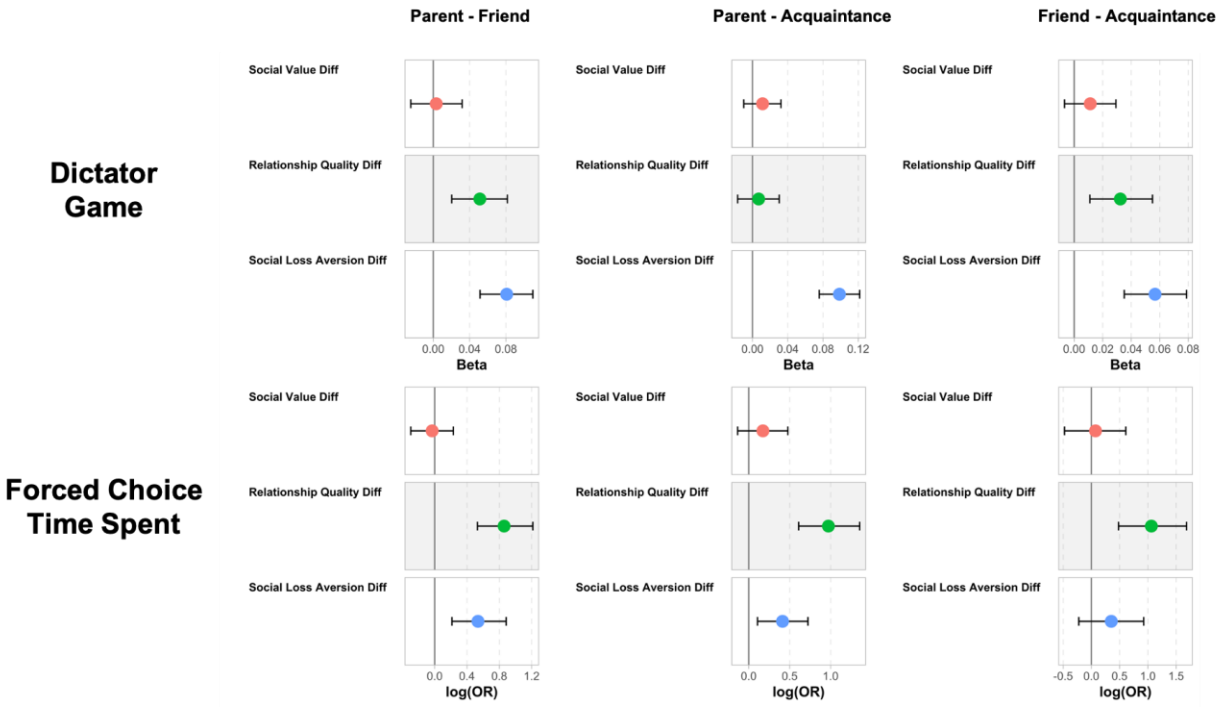

730 *Note.* ‘Forced Choice Spend Time’ refers to a one-shot, binary question asking participants to  
731 choose one of two social partners with whom they would rather spend a free afternoon. ‘Diff’  
732 references to a difference score taken between the listed metric (social value scores,  
733 relationship quality, social loss aversion) for the two familiar others labeled at the top of each  
734 column (in the order listed, e.g., parent – friend means friend scores on a given metric were  
735 subtracted from parent scores). All predictors were standardized. Dots reflect coefficients from  
736 Bayesian regression and bars reflect 89% HDIs. Evidence was judged to be robust if the HDI  
737 did not include 0 or the HDI fell outside of the Region of Practical Equivalence (ROPE) and  
738 moderate if part of the HDI fell outside of ROPE (see “Inferential Criteria” section of the main  
739 text). ROPE was defined as the range between -0.1 to 0.1. Here, when controlling for  
740 relationship quality and social loss aversion, there was moderate evidence that social value  
741 scores were associated with choice preferences regarding whether participants would rather  
742 spend time with their parent or friend, whether they would rather spend time with their parent or  
743 acquaintance, and whether they would rather spend time with their friend or acquaintance.  
744 Comparable evidence was not found for choices in the dictator game. The sample size for this  
745 analysis is  $N = 320$ .

746
